# Supplementary material for: The response of AUSM to precession forcing and its relation to EASM and EAWM
Source: Research Square preprint supplement (doi:10.21203/rs.3.rs-5092629/v1), 2025-04-23
Supplement: Supplementary file 1 [file 148bf45eea1c177e2ef62e83.pdf]

## **The response of AUSM to precession forcing and its relation to EASM and EAWM**

Mi Yan<sup>1,2</sup>, Zhengyu Liu<sup>3</sup>, Bin Wang<sup>4</sup>, Xinwei Kong<sup>1</sup>, Liang Ning<sup>1,2</sup>, Qin Wen<sup>1,2</sup>, Jian Liu<sup>\*1,5</sup>

1 State Key Laboratory of Climate System Prediction and Risk Management, Key Laboratory for Virtual Geographic Environment, State Key Laboratory Cultivation Base of Geographical Environment Evolution of Jiangsu Province, Jiangsu Center for Collaborative Innovation in Geographical Information Resource Development and Application, School of Geography, Nanjing Normal University, Nanjing, China

2 State Key Laboratory of Loess and Quaternary Geology, Institute of Earth Environment, CAS, Xi'an, China

3 Department of Geography, The Ohio State University, Columbus, Ohio, USA

4 Department of Atmospheric Sciences, University of Hawai'i at Manoa, Honolulu, HI, USA

5 Jiangsu Provincial Key Laboratory for Numerical Simulation of Large Scale Complex System, School of Mathematical Science, Nanjing Normal University, Nanjing, China

\*Corresponding author: [jliu@njnu.edu.cn](mailto:jliu@njnu.edu.cn)

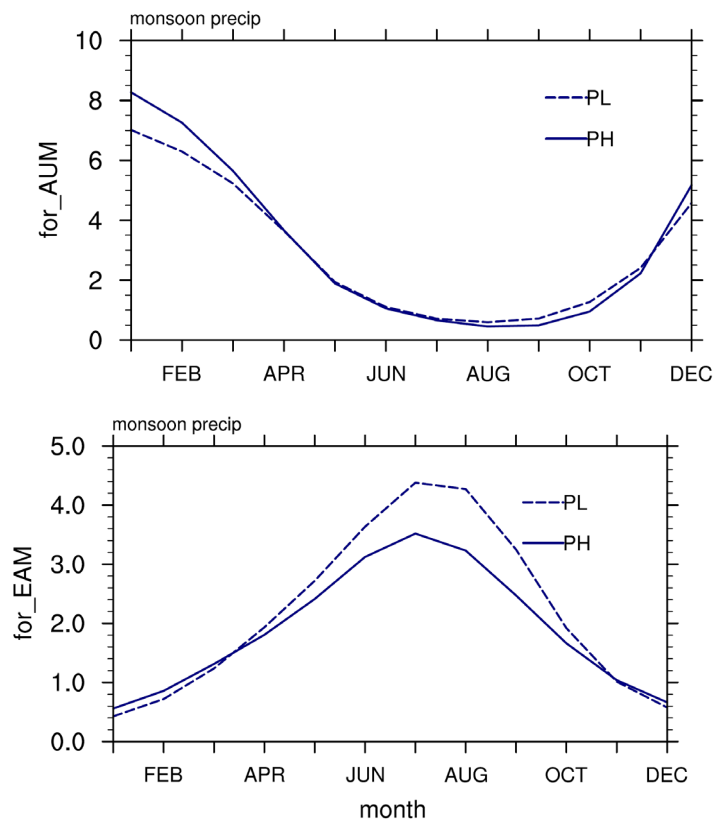

Figure S1 Composite seasonal cycles of precipitation in east Asian monsoon regions (upper panel) and Australian monsoon region (lower panel) at high (solid line, PH) and low (dashed line, PL) precession stages.

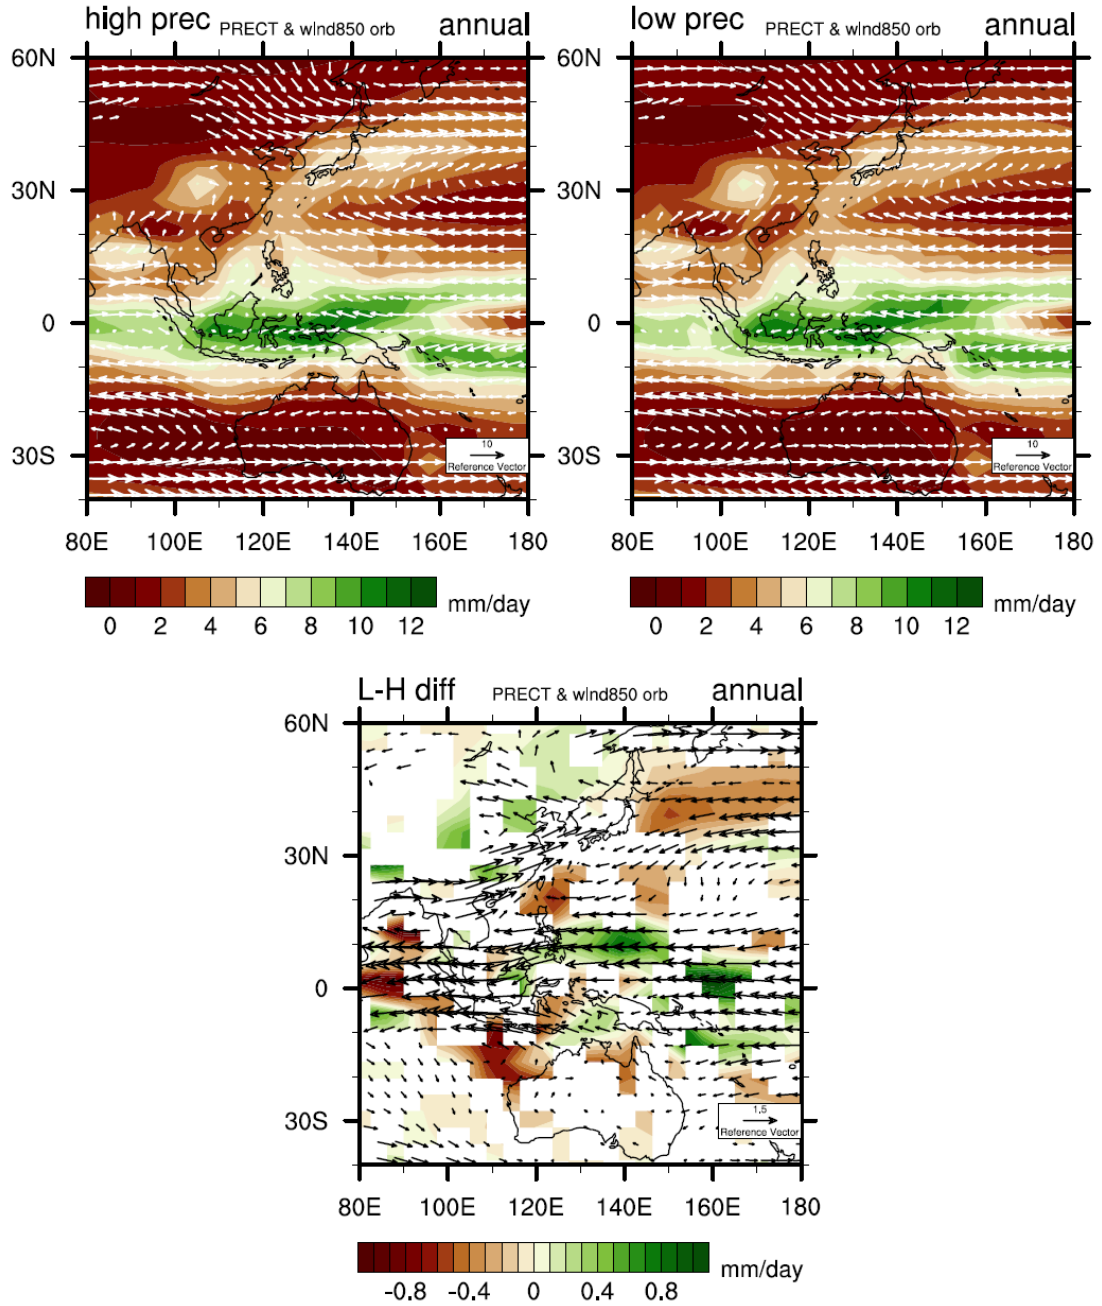

Figure S2 The composite maps of annual mean total precipitation rate (shading, PRECT) and horizontal wind at 850 hPa (vector, wind850) at high and low precession stages (a, b) and their anomalies (c). The anomalies are obtained between the low and high precession states ( $P_{low} - P_{high}$ ). Only those values above 95 % confidence level are shown in (c).

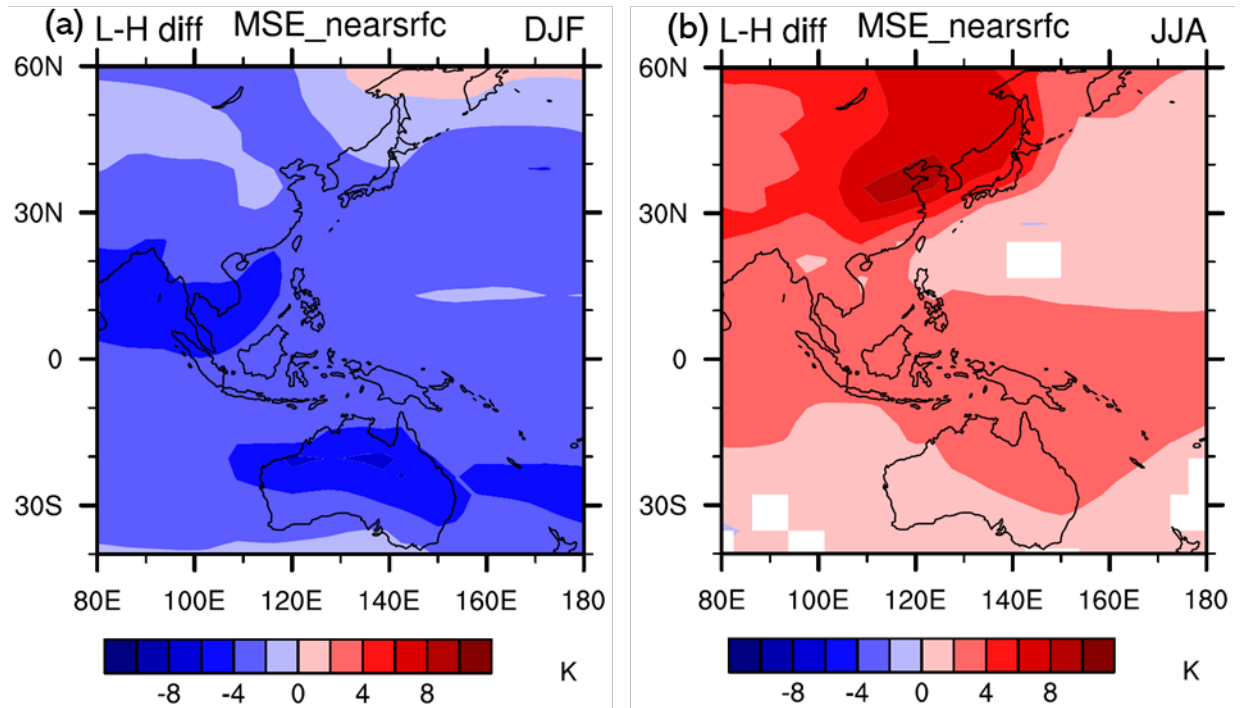

Figure S3 Composite maps of near surface moist static energy anomalies in DJF (a) and JJA (b). The composite anomalies are the differences between low (L) and high (H) precession states. Only those values above 95 % confidence level are shown.

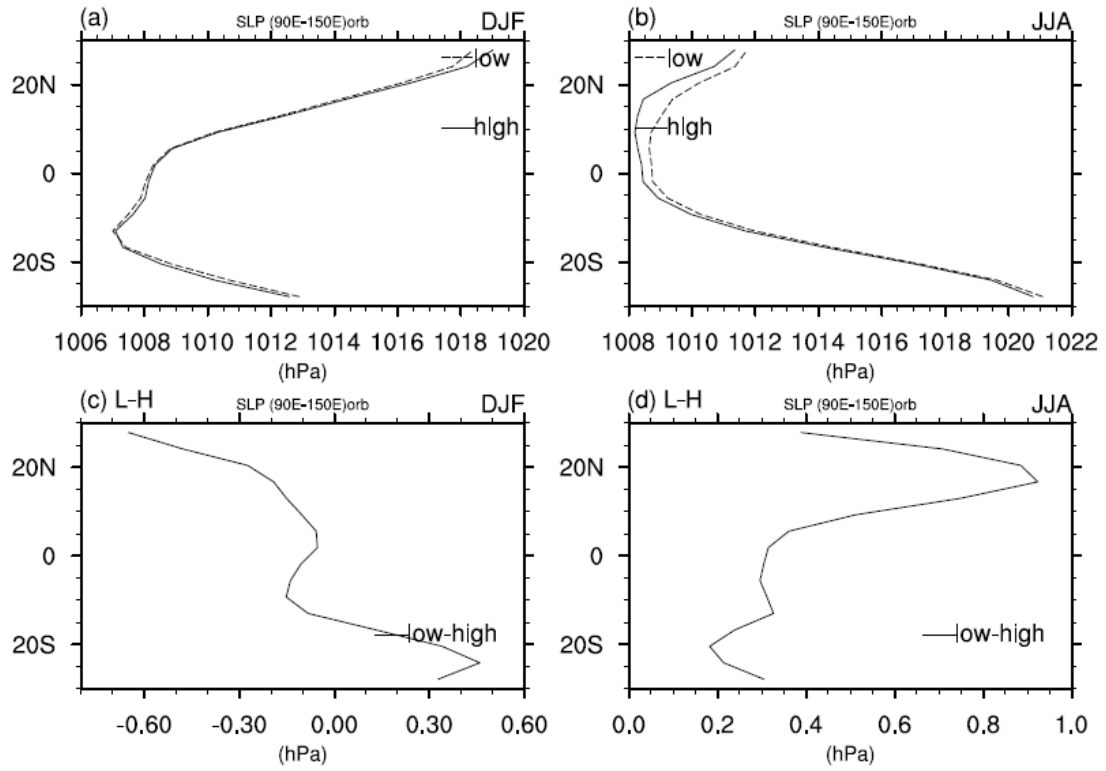

Figure S4 Composite maps of zonal mean sea level pressure (SLP) over (90E-150E) climatology at high (solid line) and low (dashed line) precession stages (a, b) and its anomalies (c, d) in DJF (a, c) and JJA (b, d). The composite anomalies are the differences between low and high precession states (L-H).

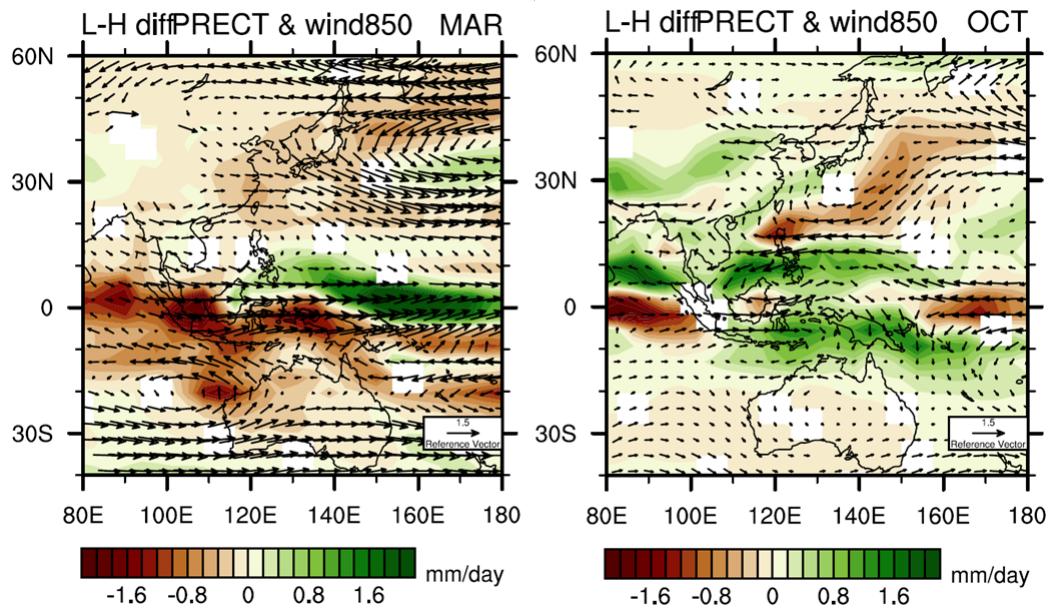

Figure S5 The composite maps of total precipitation rate (shading, PRECT) and horizontal wind at 850 hPa (vector, wind850) anomalies in March (MAR, a) and in October (OCT, b). The differences are obtained between the low and high precession states ( $P_{\text{low}} - P_{\text{high}}$ ). Only those values above 95 % confidence level are shown.
